# Supplementary material
Source: publisher figshare collection journal article supplement (https://diabetesjournals.figshare.com/ndownloader/files/31655894)
Supplement: Supplementary file 1 [file 31655894]

# Supplemental Figure S1

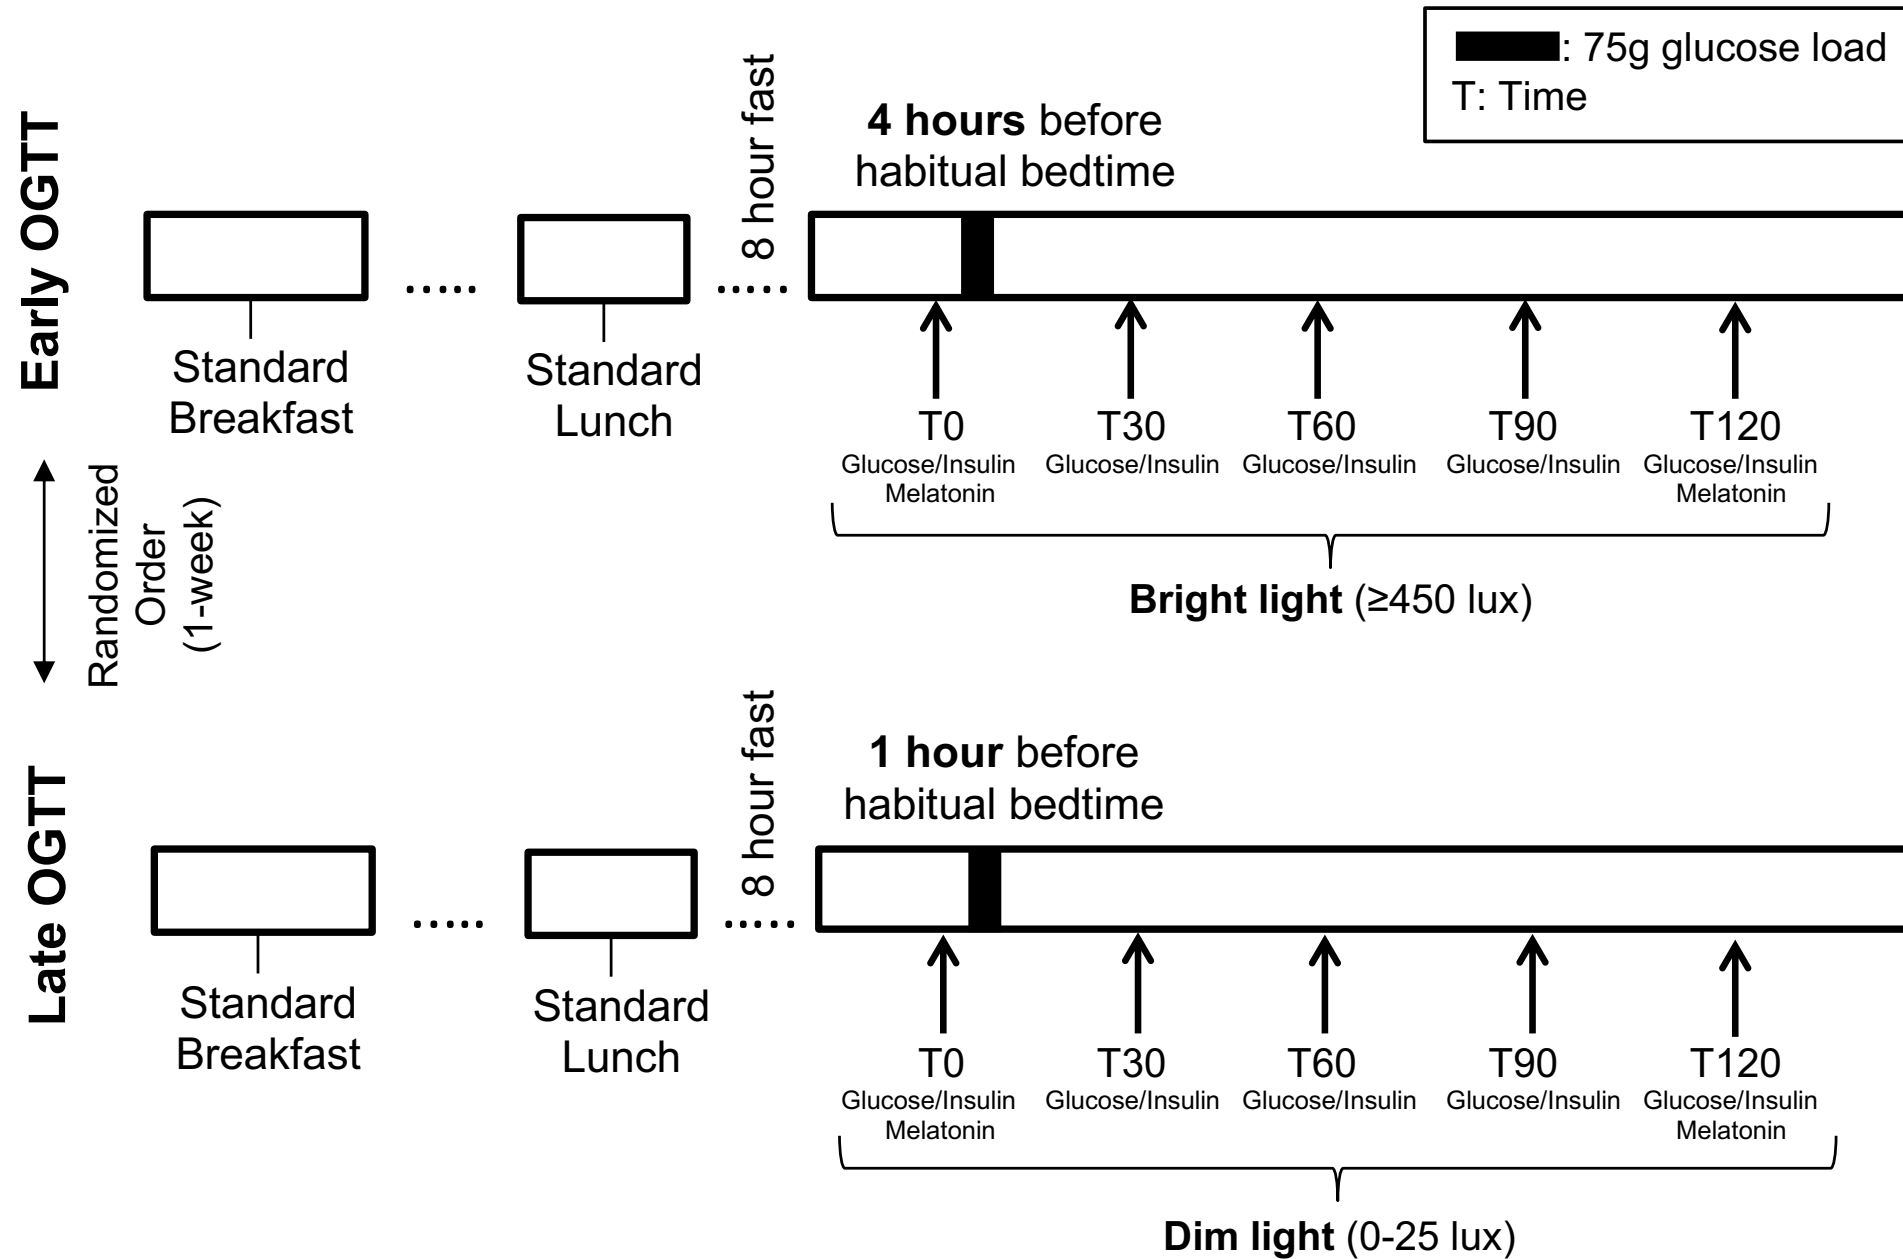

## Supplemental Figure S2

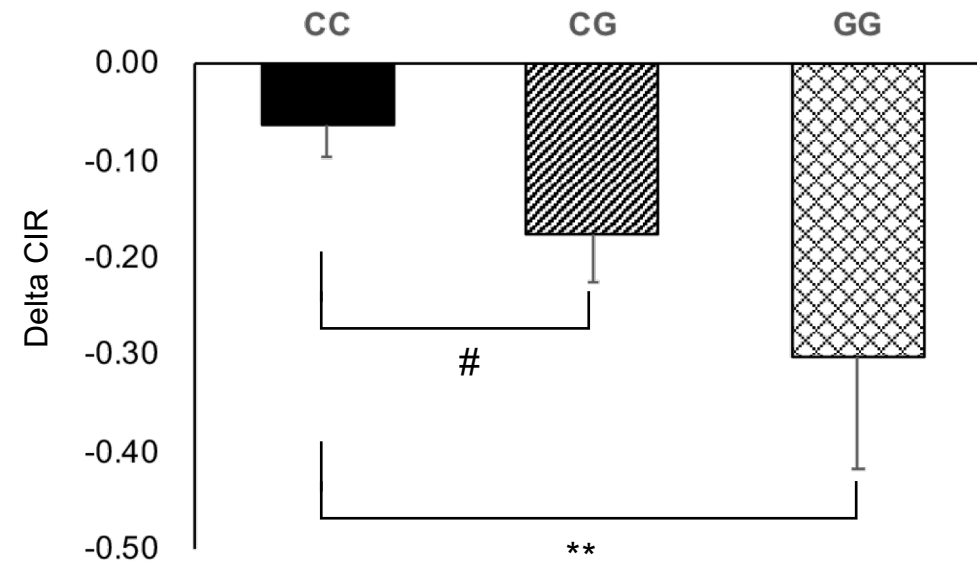

ANOVA:  $P < 0.05$

# Supplemental Figure S3

## High Melatonin Concentration in Late Evening OGTT

Insulin time x Dinner condition x Genotype:  $P=0.036$

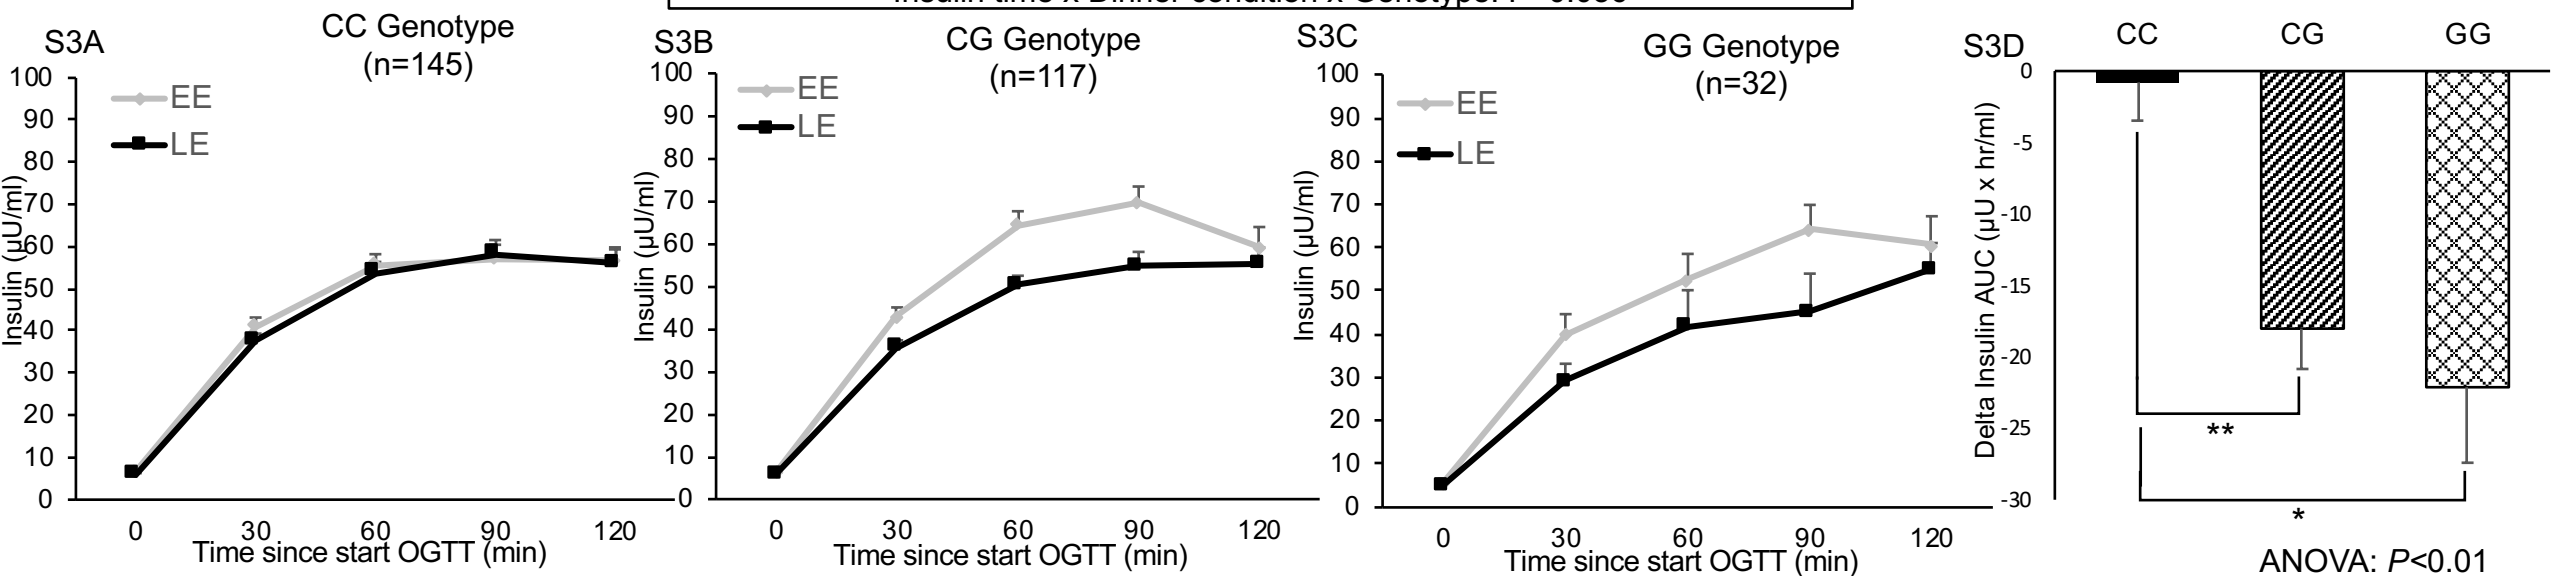

## Low Melatonin Concentration in Late Evening OGTT

Insulin time x Dinner condition x Genotype:  $P=0.144$

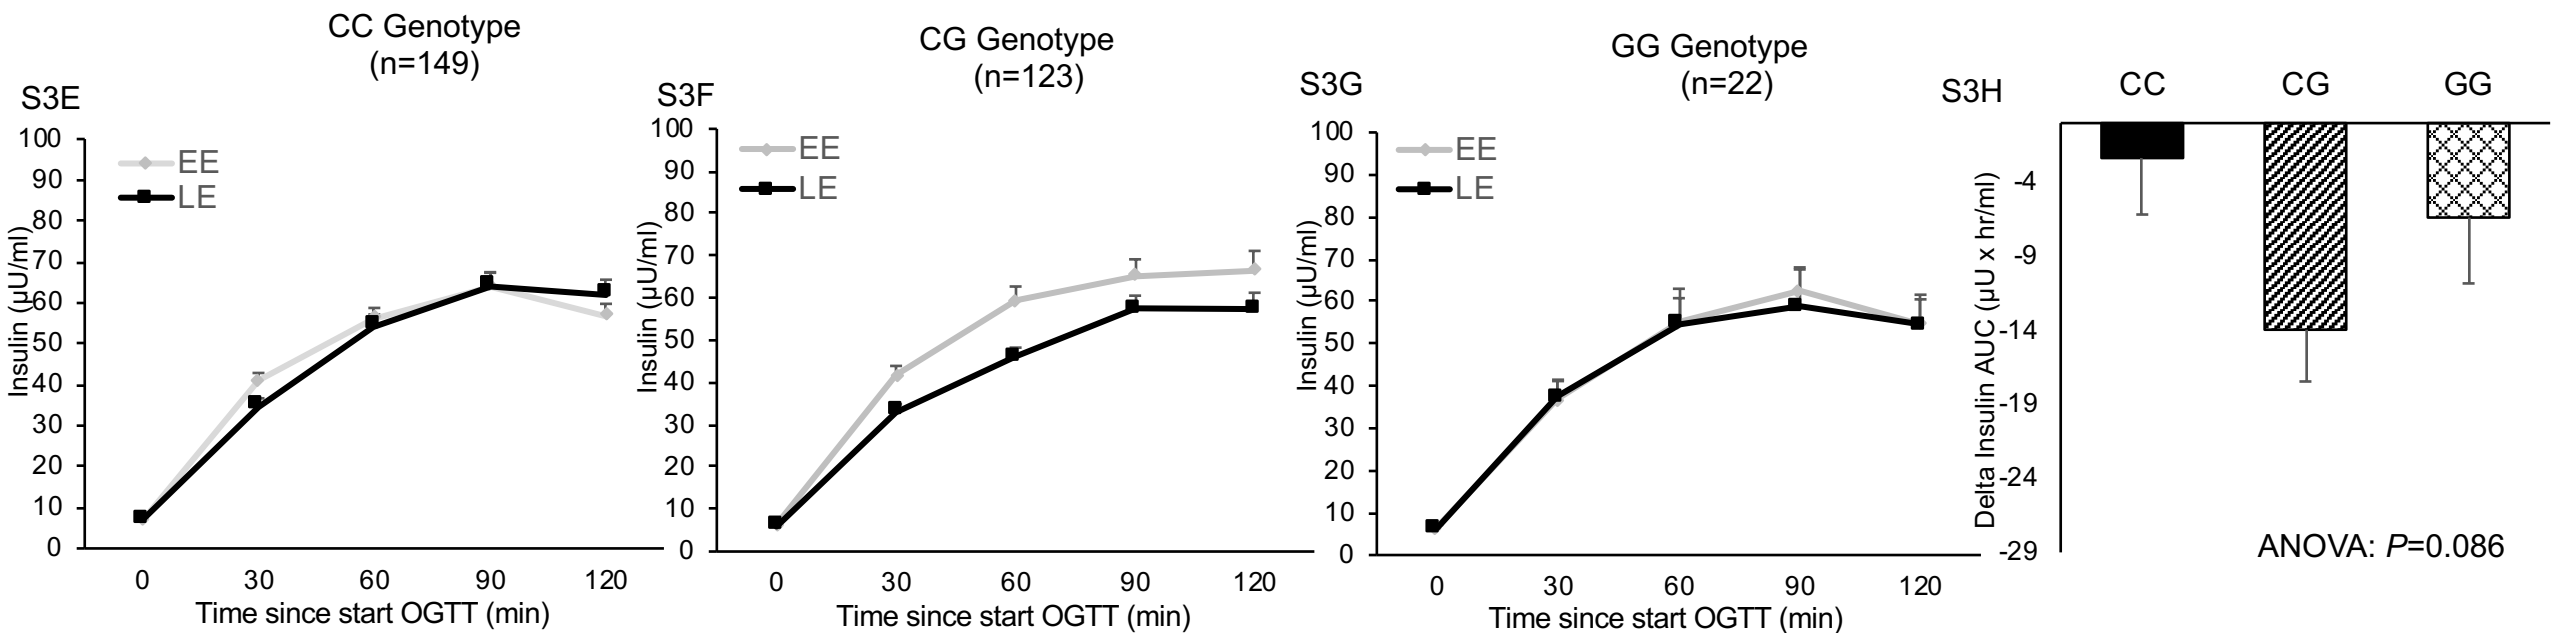

# Supplemental Figure S4

## High Melatonin Concentration in Late Evening OGTT

Glucose time x Dinner condition x Genotype: P=0.102

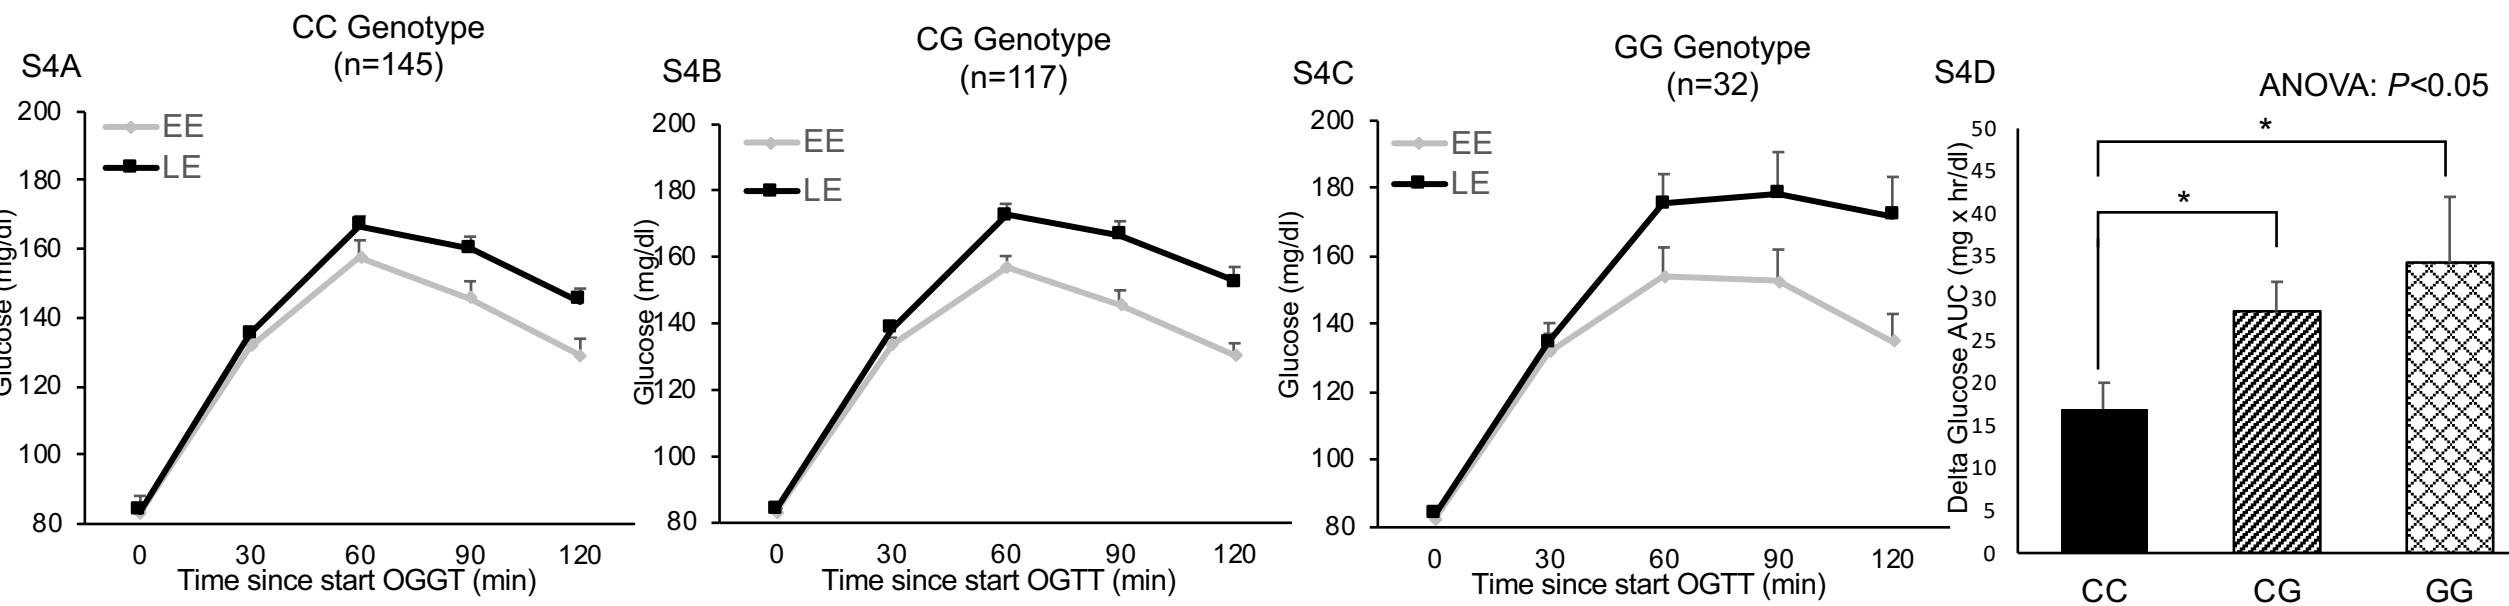

## Low Melatonin Concentration in Late Evening OGTT

Glucose time x Dinner condition x Genotype: P=0.412

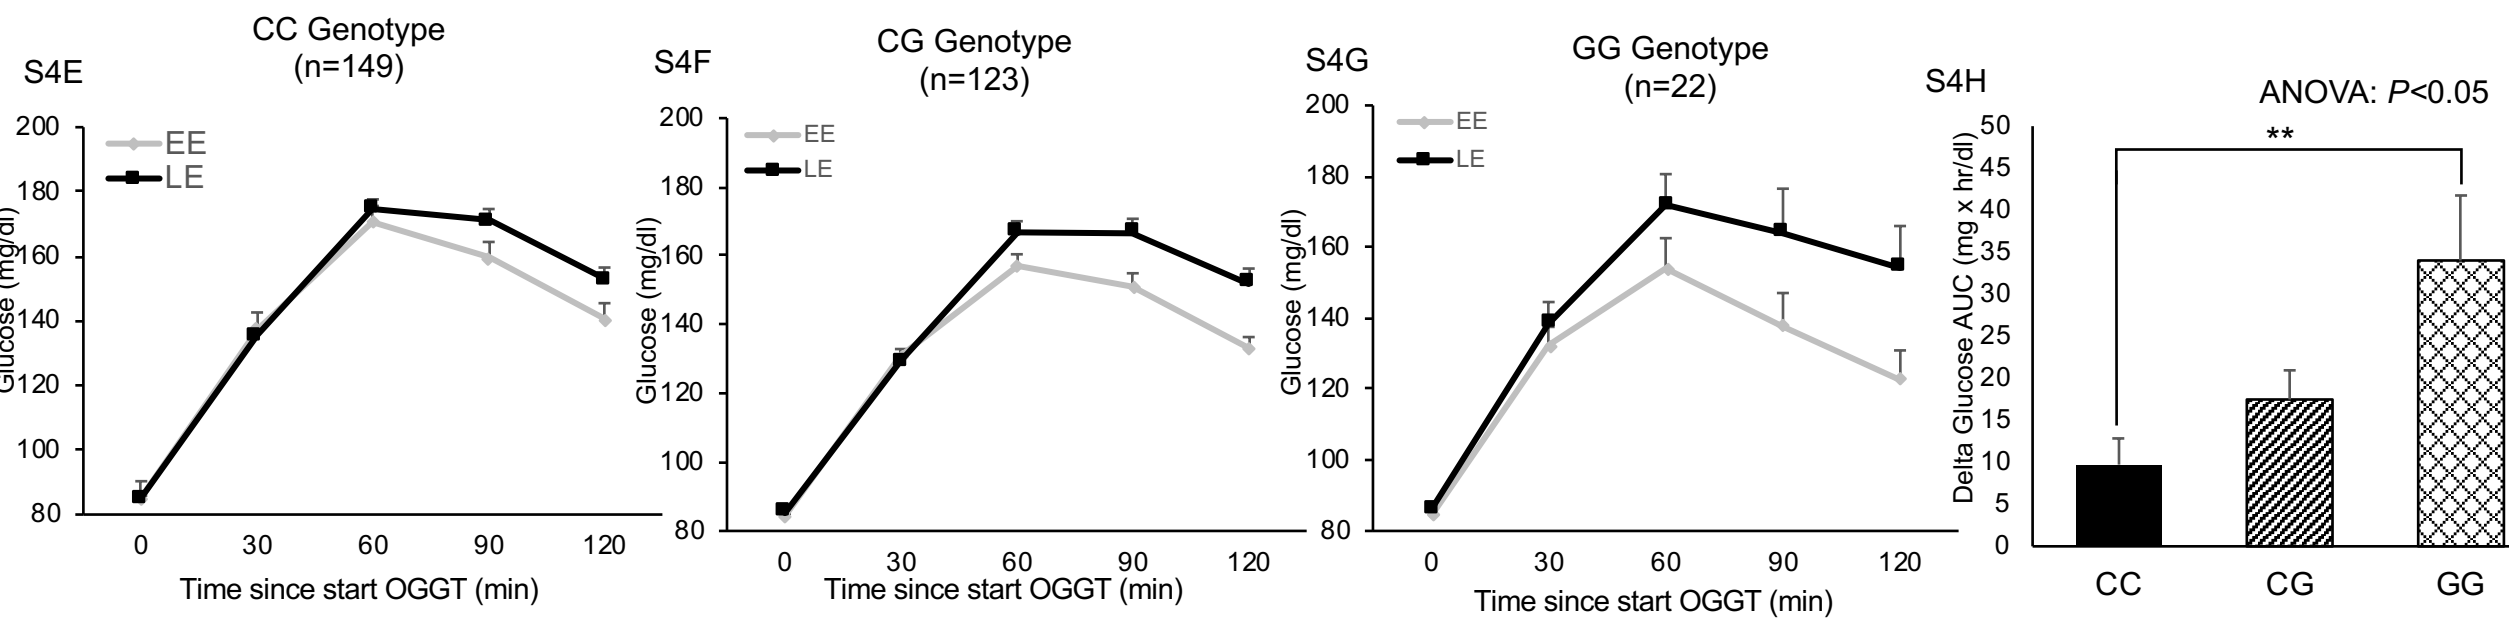

## Supplemental Table S5.

|                                       | MTNR1B genotype             |              |                        |              |                        |              |                       |              |                     |                             |                                        |
|---------------------------------------|-----------------------------|--------------|------------------------|--------------|------------------------|--------------|-----------------------|--------------|---------------------|-----------------------------|----------------------------------------|
|                                       | Total Population<br>(n=845) |              | CC genotype<br>(n=423) |              | CG genotype<br>(n=342) |              | GG genotype<br>(n=80) |              | Genotype<br>(n=845) | Dinner<br>timing<br>(n=845) | Genotype X<br>Dinner timing<br>(n=845) |
|                                       | EE                          | LE           | EE                     | LE           | EE                     | LE           | EE                    | LE           | P value             | P value                     | P value                                |
| Test start time, hh:mm                | 19:49±00:40                 | 22:48±01:00  | 19:47±00:39            | 22:44±01:14  | 19:51±00:04            | 22:50±00:42  | 19:50±00:39           | 22:50±00:39  | 0.100               | 0.0001                      | 0.876                                  |
| Fasting glucose, mg/dl                | 84.57±7.21                  | 84.74±7.23   | 84.84±7.32             | 84.4±7.43    | 84.51±7.45             | 85.19±6.96   | 83.44±5.32            | 84.6±7.32    | 0.473               | 0.286                       | 0.197                                  |
| Postprandial glucose (30 min), mg/dl  | 132.68±25.24                | 136.53±25.78 | 134.4±26.11            | 136.19±24.19 | 131.21±23.96           | 135.8±26.41  | 129.91±25.52          | 141.39±30.58 | 0.327               | 0.001                       | <b>0.048</b>                           |
| Postprandial glucose (2 hours), mg/dl | 132.71±37.80                | 153.07±43.13 | 134.52±38.87           | 149.60±42.23 | 130.67±36.15           | 154.34±42.92 | 131.85±39.04          | 166.03±46.39 | 0.097               | 0.001                       | <b>0.008</b>                           |
| Fasting insulin, µU/ml                | 6.46±4.3                    | 6.07±4.1     | 6.7±4.61               | 6.32±4.51    | 6.25±4                 | 5.87±3.73    | 6.15±3.75             | 5.55±3.09    | 0.064               | 0.091                       | 0.956                                  |
| Postprandial insulin (30 min), µU/ml  | 41.52±26.5                  | 36.79±25.19  | 41.61±26.45            | 38.56±26.4   | 41.82±26.91            | 34.72±23.81  | 39.78±25.25           | 36.26±23.91  | 0.435               | 0.002                       | 0.254                                  |
| Glucose AUC (mgxhour/dl)              | 276.09±52.06                | 299.01±55.52 | 280.49±51.91           | 296.16±53.4  | 271.53±51.8            | 299.89±55.92 | 272.34±52.66          | 310.31±63.46 | 0.366               | 0.0001                      | <b>0.009</b>                           |
| Insulin AUC (µUxhour/ml)              | 98.25±51.55                 | 91.67±50.13  | 96.27±50.41            | 95.99±53.21  | 100.71±53.35           | 88.04±47.62  | 98.21±49.82           | 84.36±41.5   | 0.599               | 0.005                       | <b>0.035</b>                           |
| Insulin/glucose AUC                   | 6.2±3.18                    | 5.65±3.04    | 5.98±3.11              | 5.98±3.25    | 6.44±3.29              | 5.40±2.89    | 6.27±3.06             | 4.97±2.21    | 0.872               | 0.0001                      | <b>0.023</b>                           |
| Insulin Sensitivity Index             | 7.29±4.92                   | 7.71±5.98    | 7.28±5.22              | 7.55±6.12    | 7.33±4.73              | 7.89±5.89    | 7.15±3.94             | 7.79±5.75    | 0.795               | 0.154                       | 0.869                                  |
| Corrected Insulin Response            | 0.62±0.76                   | 0.49±0.47    | 0.58±0.57              | 0.52±0.54    | 0.65±0.88              | 0.48±0.42    | 0.69±1                | 0.39±0.26    | 0.887               | 0.001                       | <b>0.022</b>                           |
| Disposition Index                     | 3.89±4.38                   | 3.15±3.15    | 3.49±3.04              | 3.26±3.51    | 4.28±5.48              | 3.07±2.53    | 4.39±4.96             | 2.93±3.53    | 0.293               | 0.001                       | <b>0.018</b>                           |

EE: Early dinner timing condition. LE: Late dinner timing condition. Data are mean ± SD. AUC: Area Under the Curve.  
The *P* values of the Genotype X Dinner timing interaction were calculated using a GLM Univariate Analysis (ANOVA).

## Supplemental Table S6

Associations between MTNR1B risk variant and difference in glycemic outcomes between early and late dinner timing. Results are *per* additional copy of the G risk allele

|                                 | Beta (95% CI)         | P value |
|---------------------------------|-----------------------|---------|
| Melatonin, baseline*‡(pg/ml)    | 1.42 (-3.45, 6.29)    | 0.569   |
| Melatonin, 120 minutes* (pg/ml) | 2.51 (-4.25, 9.27)    | 0.467   |
| Glucose, fasting (mg/dl)        | 0.97 (0.2, 1.75)      | 0.014   |
| Glucose, 30 minutes (mg/dl)     | 4.41 (1.7, 7.11)      | <0.001  |
| Glucose, 60 minutes (mg/dl)     | 6.89 (3.41, 10.36)    | <0.0001 |
| Glucose, 90 minutes (mg/dl)     | 7.63 (3.83, 11.43)    | <0.0001 |
| Glucose, 120 minutes (mg/dl)    | 9.55 (5.95, 13.16)    | <0.0001 |
| Insulin, fasting* (μU/ml)       | -0.1 (-0.6, 0.4)      | 0.697   |
| Insulin, 30 minutes* (μU/ml)    | -2.3 (-5.26, 0.66)    | 0.128   |
| Insulin, 60 minutes* (μU/ml)    | -5.14 (-9.38, -0.89)  | 0.018   |
| Insulin, 90 minutes* (μU/ml)    | -7.37 (-12.07, -2.67) | 0.002   |
| Insulin, 120 minutes* (μU/ml)   | -8.07 (-12.96, -3.18) | <0.001  |
| Glucose, AUC (mgxhour/dl)       | 12.53 (8.08, 16.98)   | <0.0001 |
| Insulin, AUC* (μUxhour/ml)      | -9.56 (-15.07, -4.06) | <0.001  |
| Glucose to insulin ratio, AUC*  | 0.48 (0.15, 0.81)     | <0.005  |
| HOMA IR*                        | 0 (-0.11, 0.1)        | 0.930   |
| HOMA-B*                         | -12.69 (-29.35, 3.98) | 0.136   |
| QUICKI                          | 0.09 (-0.28, 0.47)    | 0.620   |
| Insulin sensitivity index*      | 0.25 (-0.45, 0.96)    | 0.479   |
| Corrected insulin response*     | -0.13 (-0.21, -0.05)  | 0.003   |
| Disposition Index*              | -0.77 (-1.28, -0.26)  | 0.003   |

Association results are from linear regression models adjusted for age, sex, and BMI with an additive genetic model.

\*log-transformed outcome. ‡n=556.

AUC: Area Under the Curve; HOMA-IR: Homeostatic Model Assessment of Insulin Resistance; HOMA-B: Homeostatic model assessment; QUICKI: quantitative insulin sensitivity check index.

**Supplemental Figure S1. Study protocol of ONTIME-MT study.**

Individualized study protocol based on participants' habitual bedtime for early and late simulated dinner conditions. In both conditions, participants of the three genotype groups (CC, CG and GG) consumed standardized breakfast and lunch on that day prior to glucose load. Glucose bolus for the OGTT was scheduled 4 hours or 1 hour before habitual bedtime to simulate early and later dinner timing conditions, respectively. Habitual bedtime was determined using a study-specific smartphone application. Blood was collected for measurements of glucose and insulin prior to (T0) and T30, T60, T90 and T120 minutes after the start of the OGTT. Furthermore, blood for melatonin assessment was collected prior to (T0) and at T120 minutes after the start of the OGTT. At approximately ~30 minutes prior to and during the 2-hour tests, participants were placed in moderately bright light ( $\geq 450$  lux) for the early dinner timing condition and in dim light (0-25 lux) for the late dinner timing condition. The order of the OGTTs was randomized, and OGTTs were conducted on the same day of the week with a 1-week washout period.

**Supplemental Figure S2. Comparison of delta Corrected Insulin Response (CIR) (between late and early dinner timing condition) across *MTNR1B* risk variant.** A one-way ANOVA was used to compare across MTNR1B genotypes (GG, CG and CC) ( $P < 0.05$ ), and Fisher's LSD tests were used for pairwise comparisons among genotypes (\* $P < 0.05$ ; #a trend  $P = 0.061$ ).

**Supplemental Figure S3. Comparison of insulin profiles and delta AUC among *MTNR1B* genotypes in low and high melatonin concentrations.** Comparison of insulin secretion and delta insulin AUC among MTNR1B genotypes separately in individuals with low and high melatonin concentrations. Comparison between early and late simulated dinner timing conditions of serum insulin among MTNR1B genotypes when the population was divided by high serum melatonin concentrations (S3A, S3B, S3C) and low melatonin concentrations (S3E, S3F, S3G). Time 0 minutes is fasting. Panels S3D and S3H represents the delta between LE and EE of the insulin Area Under the Curve (AUC), for individuals with high and low melatonin concentrations, respectively. A one-way ANOVA test was used to determine potential differences across genotypes (GG, CG and CC) in the delta between late and early conditions for insulin AUC by high and low melatonin concentration ( $P < 0.01$ , and  $P = 0.086$  respectively), and Fisher's LSD tests were used for pairwise comparisons among genotypes for high melatonin concentration only (\* $P < 0.05$ ; \*\* $P < 0.01$ ).

**Supplemental Figure S4. Comparison of glucose profiles and delta AUC among *MTNR1B* genotypes in low and high melatonin concentrations.** Comparison of glucose profiles and delta glucose AUC among MTNR1B genotypes in individuals with low and high melatonin concentrations. Comparison between early and late simulated dinner timing conditions of serum glucose among MTNR1B genotypes when the population was divided by high melatonin concentrations (S3A, S3B, S3C) and low melatonin concentrations (S3E, S3F, S3G). Time 0 minutes is fasting. Panels S3D and S3H represents the delta between LE and EE of the glucose Area Under the Curve (AUC), separated by high and low melatonin concentrations, respectively. A one-way ANOVA test was used to determine potential differences across genotypes (GG, CG and CC) in the delta between late and early conditions for the glucose AUC by high and low melatonin concentration ( $P < 0.05$ , and  $P < 0.05$  respectively), and Fisher's LSD tests were used for pairwise comparisons among genotypes by high and low melatonin concentration (\* $P < 0.05$ ; \*\* $P < 0.01$ ).
